# Supplementary material
Source: MDPI journal article supplement (https://www.mdpi.com/2079-6412/10/8/711)
Supplement: s1 [file s1]

# Supplementary Materials: Skin-Like Strain Sensor Enabled by Elastomer Composites for Human–Machine Interfaces

Chunki Yiu <sup>1</sup>, Tsz Hung Wong <sup>1</sup>, Yiming Liu <sup>1</sup>, Kuanming Yao <sup>1</sup>, Ling Zhao <sup>1</sup>, Dengfeng Li <sup>1</sup>, Zhao Hai <sup>1</sup>, Huanxi Zheng <sup>2</sup>, Zuankai Wang <sup>2</sup> and Xinge Yu <sup>1,\*</sup>

<sup>1</sup> Department of Biomedical Engineering, City University of Hong Kong, Hong Kong 999077, China; chunkiyiu2-c@my.cityu.edu.hk (C.Y.); thwong247-c@my.cityu.edu.hk (T.H.W.); lyiming2-c@my.cityu.edu.hk (Y.L.); km.Yao@my.cityu.edu.hk (K.Y.); lingzhao3-c@my.cityu.edu.hk (L.Z.); dengfli2@cityu.edu.hk (D.L.); zhaohai2-c@my.cityu.edu.hk (Z.H.)

<sup>2</sup> Department of Mechanical Engineering, City University of Hong Kong, Hong Kong 999077, China; huanzheng4-c@my.cityu.edu.hk (H.Z.); zuanwang@cityu.edu.hk (Z.W.)

\* Correspondence: xingeyu@cityu.edu.hk

**Table S1.** Summary for the flexible strain sensors based on piezoresistance.

| Materials                                                                                   | Typical Performances                                                                                                                                                                      | Flexibility                       | Sensitivity                                                                                | Reference |
|---------------------------------------------------------------------------------------------|-------------------------------------------------------------------------------------------------------------------------------------------------------------------------------------------|-----------------------------------|--------------------------------------------------------------------------------------------|-----------|
| PDMS, copper electrode, graphene/carbon nanotube (CNT)/Ecoflex composite                    | The strain sensor is stretched from 0% to 20 % and the $\Delta R/R_0$ increase from 0.0144 to 4.856                                                                                       | Against tensile strain up to 20%  | The gauge factor is 26                                                                     | This work |
| SWNTs and nylon textile                                                                     | The 20 bilayers of SWNT/ nylon textile exhibited a gauge factor as high as 72 at 100% strain.                                                                                             | Stretchability up to 100%         | The gauge factor is 72 at 100% strain                                                      | [7]       |
| Ni, SiO <sub>2</sub> , Si graphene and PDMS                                                 | The resistances measured from the three gauges increase continuously as the increase of the strain.                                                                                       | Against tensile strain up to 7.1% | <1.8% strain, the gauge factor is 2.4. >1.8% strain, the gauge factor ranges from 4 to 14. | [9]       |
| Ultrathin gold nanowires and polymeric substrates                                           | The ultrathin sensors could detect dynamic tensile strain over a wide range (0.01%–200%).                                                                                                 | Stretchability >350%              | The gauge factor ranges from 6.9 to 9.9                                                    | [11]      |
| Conductive thermoplastic polyurethane/carbon nanotubes/polydimethylsiloxane (TPU/CNTs/PDMS) | The sensing intensity for TPU/CNTs-50/PDMS-360 is around 10.3% under 30% strain, and it increases to about 17% and 19.5% with increasing the strain to 50% and 100%, respectively         | Against tensile strain up to 100% | The gauge factor ranges from 0.194 to 0.339                                                | [13]      |
| Carbon nanotube (CNT) layers and polydimethylsiloxane (PDMS) substrate                      | All the sensors exhibited similar piezoresistive responses to the strain, and with the increasing of strain, the electrical resistance of all the sensors increased                       | Stretchability up to 45%          | The gauge factor is 35.75                                                                  | [20]      |
| Ag nanoparticles (NPs), carbon nanotubes (CNTs) polydimethylsiloxane (PDMS)                 | When the Ag NPs concentration is $2.82 \times 10^4$ mM and the applied strain increases to 25%, the maximum difference in the relative resistance change ratio between the stretching and | Stretchability of 95.8%           | The gauge factor ranges from 2.1 to 39.8                                                   | [30]      |

|                                                                                                |                                                                                                                                                                                                                                                           |                           |                                                                                        |      |
|------------------------------------------------------------------------------------------------|-----------------------------------------------------------------------------------------------------------------------------------------------------------------------------------------------------------------------------------------------------------|---------------------------|----------------------------------------------------------------------------------------|------|
|                                                                                                | releasing process is 10.3%. When the Ag NPs concentration increases to $8.46 \times 10^4$ mM and the applied strain reaches 95.6%, the maximum difference is only 1.66%.                                                                                  |                           |                                                                                        |      |
| Thin films of aligned single-walled carbon nanotubes and polydimethylsiloxane (PDMS) substrate | The sensor was cycled between 5 and 100% strain at a speed of $10.6 \text{ mm s}^{-1}$ and with a recovery time of 5 s. The response of the carbon-nanotube strain sensor to this strain was fast, with a low overshoot of 3.0% and recovery time of ~5 s | Stretchability up to 280% | The gauge factors were calculated to be 0.82 (0 to ~40% strain) and 0.06 (~60 to 200%) | [34] |

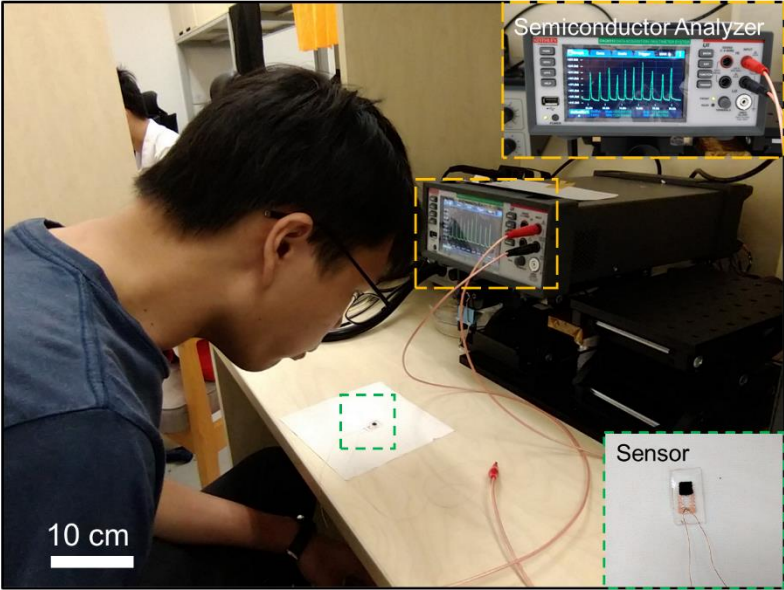

Figure S1. The complete data acquisition chain as measuring the data in Figure 3c.

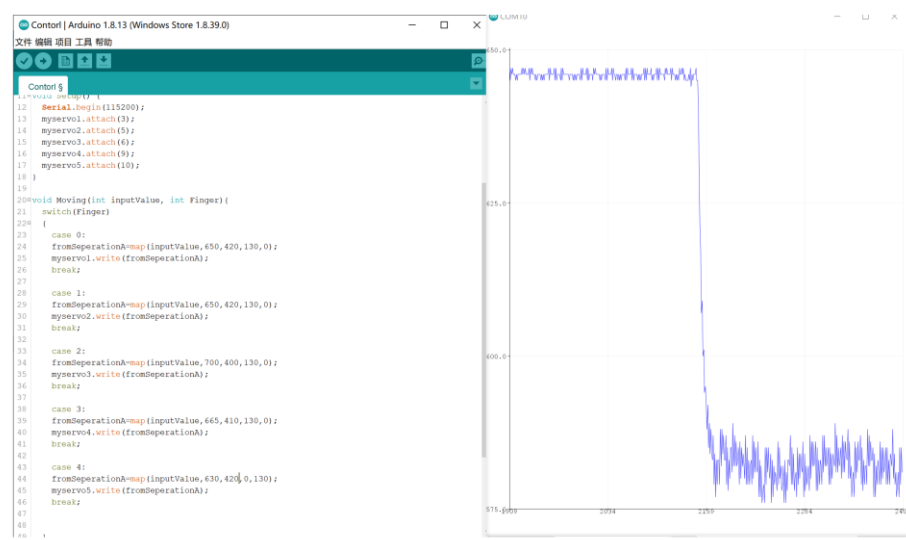

Figure S2. The self-developed software interface for controlling robotic hand.
